# Supplementary material for: Understanding problems of lithiated anodes in lithium oxygen full-cells
Source: Royal Society of Chemistry journal article supplement (doi:10.1039/c6ta03013k), 2016-01-01
Supplement: c6ta03013k1.pdf [file c6ta03013k1.pdf]

Journal of Materials Chemistry A

## Supporting information

### Understanding problems of lithiated anode in lithium oxygen full-cells

Won-Jin Kwak,<sup>a</sup> Hyeon-Ji Shin,<sup>a</sup> Jakub Reiter,<sup>b</sup> Nikolaos Tsiouvaras,<sup>b</sup> Jusef Hassoun,<sup>c</sup> Stefano Passerini,<sup>d</sup> Bruno Scrosati,<sup>e</sup> and Yang-Kook Sun<sup>\*a</sup>

<sup>a</sup>Department of Energy Engineering, Hanyang University, 133-791, Republic of Korea

<sup>b</sup>BMW Group, Petuelring 130, 80788 Munich, Germany

<sup>c</sup>Dipartimento di Scienze Chimiche e Farmaceutiche, Università di Ferrara, Via Fossato di Mortara 17, 44121 Ferrara, Italy

<sup>d</sup>Helmholtz Institute Ulm, Helmholtzstr. 11, 89081 Ulm, Germany

Karlsruher Institute of Technology (KIT), P.O. Box 3640, 76021 Karlsruhe, Germany

<sup>e</sup>Elettrochimica ed Energia, 00199 Rome, Italy

\*Corresponding Author's E-mail: [yksun@hanyang.ac.kr](mailto:yksun@hanyang.ac.kr)

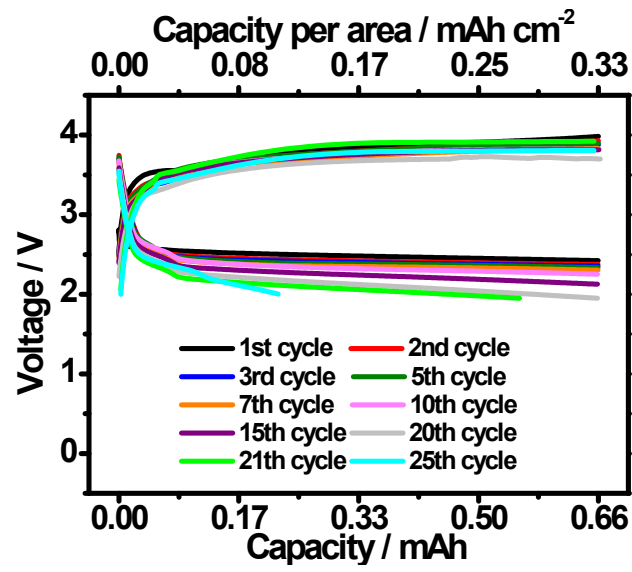

**Fig. S1** Further cycling data of Fig. 1d clearly showing the cell failure. Cell test was stopped at the 26<sup>th</sup> cycle for further analysis.

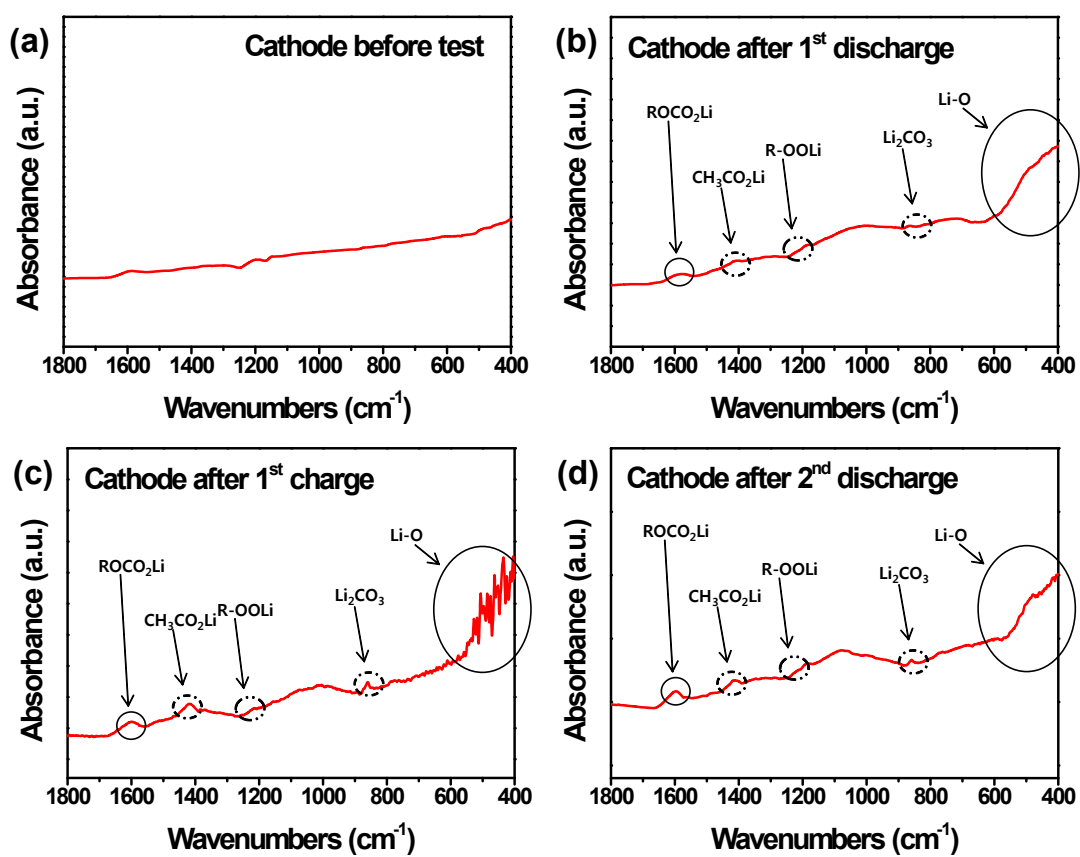

**Fig. S2** FT-IR results of the cathode (air electrode). (a) before test, after (b) 1<sup>st</sup> discharge, (c) 1<sup>st</sup> charge, and (d) 2<sup>nd</sup> discharge.

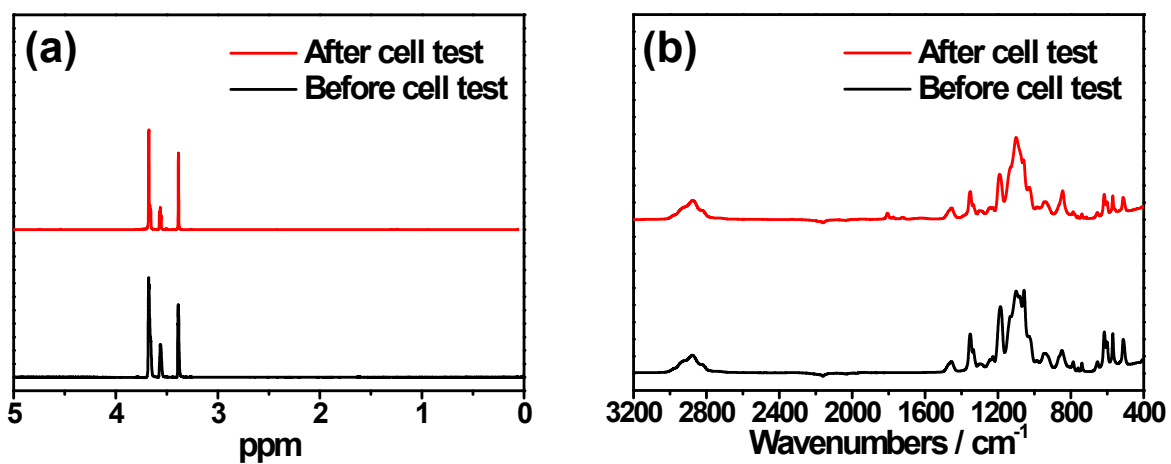

**Fig. S3** NMR and FTIR spectra of the electrolyte. (a) NMR and (b) FTIR spectra of the electrolyte (1M LiTFSI in tetraglyme) before and after the galvanostatic cell test in a Li<sub>x</sub>Si-CNT/O<sub>2</sub> full-cell. The cell tests were continued until cell failure for the purpose of comparison.

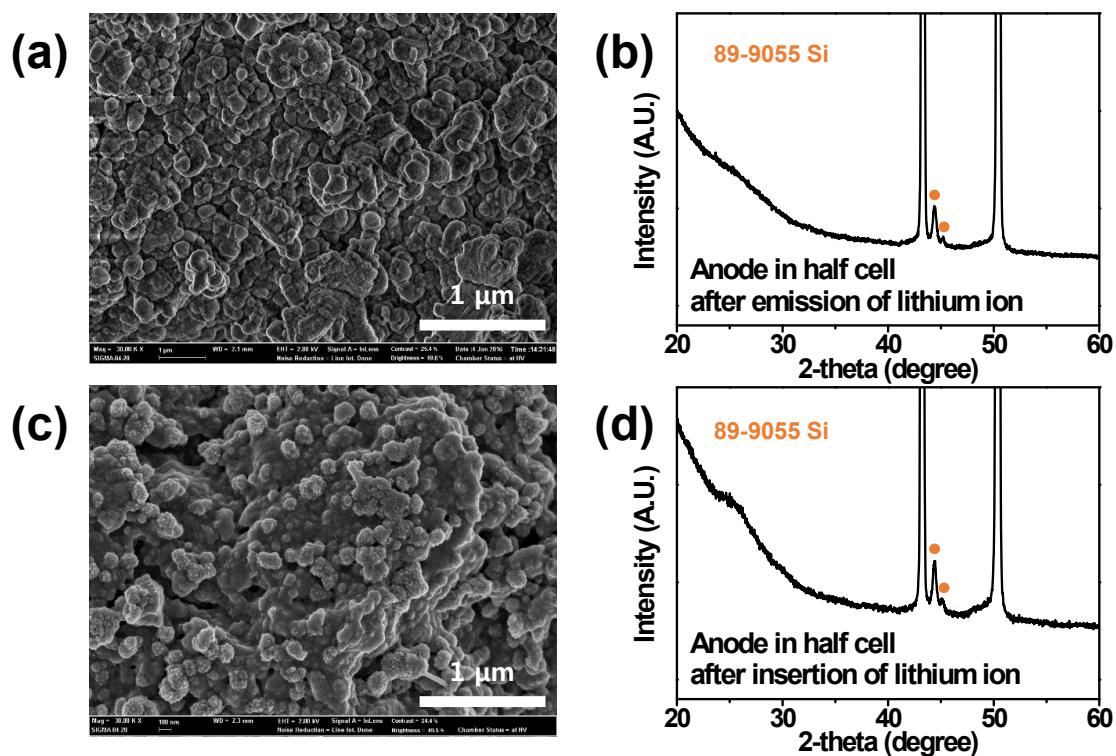

**Fig. S4** SEM image and XRD pattern results of the  $\text{Li}_x\text{Si-CNT}$  electrode in  $\text{Li}/\text{Li}_x\text{Si-CNT}$  half-cells. After galvanostatic (a, b) charge (emission of Li ion from  $\text{Li}_x\text{Si-CNT}$  to Li metal) and (c, d) discharge (insertion of Li ion from  $\text{Li}_x\text{Si-CNT}$  to Li metal) in  $\text{Li}/\text{Li}_x\text{Si-CNT}$  half-cells. The expression of discharge and charge are altered because in this anode closed cell,  $\text{Li}_x\text{Si-CNT}$  is the working electrode and Li metal is the counter electrode.
